# Supplementary material for: Drosophila melanogaster Mitochondrial Carriers: Similarities and Differences with the Human Carriers
Source: PubMed Central journal article supplement (PMC7504413; doi:10.3390/ijms21176052), 2020-08-22
Supplement: ijms-21-06052-s001.pdf [file ijms-21-06052-s001.pdf]

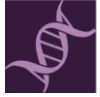

**Table S1.** List of 48 *Drosophila melanogaster* putative mitochondrial carriers.

|                                  |                                    |                                       |                                       |
|----------------------------------|------------------------------------|---------------------------------------|---------------------------------------|
| <a href="#">CG1628</a>           | <a href="#">CG4994</a> – Mpcp2     | <a href="#">CG7943</a>                | <a href="#">CG14209</a> – Tyler/Shwan |
| <a href="#">CG1683</a> – Ant2    | <a href="#">CG4995</a>             | <a href="#">CG8026</a>                | <a href="#">CG16736</a>               |
| <a href="#">CG1907</a>           | <a href="#">CG5254</a>             | <a href="#">CG8323</a>                | <a href="#">CG16944</a> – sesB        |
| <a href="#">CG2139</a> – aralar1 | <a href="#">CG5646</a>             | <a href="#">CG8790</a> – Dic1         | <a href="#">CG18317</a> – Rim2        |
| <a href="#">CG2616</a>           | <a href="#">CG5755</a> – Slc25A46b | <a href="#">CG8931</a> – Slc25A46a    | <a href="#">CG18324</a>               |
| <a href="#">CG2857</a> – Tpc2    | <a href="#">CG5805</a>             | <a href="#">CG9064</a> – UCP4C        | <a href="#">CG18327</a>               |
| <a href="#">CG3057</a> – colt    | <a href="#">CG6492</a> – UCP4A     | <a href="#">CG9090</a> – Mpc1         | <a href="#">CG18340</a> – Ucp4B       |
| <a href="#">CG3476</a> – MME1    | <a href="#">CG6608</a> – Tpc1      | <a href="#">CG9582</a>                | <a href="#">CG18347</a> – GC1         |
| <a href="#">CG4241</a> – DPCoAC  | <a href="#">CG6782</a> – sea       | <a href="#">CG10920</a>               | <a href="#">CG18363</a> – Dic4        |
| <a href="#">CG4323</a> – Dic2    | <a href="#">CG6851</a> – Mtch      | <a href="#">CG11196</a> – Dic3        | <a href="#">CG18418</a>               |
| <a href="#">CG4743</a>           | <a href="#">CG7314</a> – Bmcp      | <a href="#">CG12201</a> – GC2         | <a href="#">CG32103</a> – SCaMC       |
| <a href="#">CG4963</a> – mfrn    | <a href="#">CG7514</a>             | <a href="#">CG14208</a> – Tyler/Shwan | <a href="#">CG32250</a> – PMP34       |
